# Supplementary material
Source: publisher site journal article supplement (https://www.dovepress.com/article/357483)

**Supplementary table 1** HLXLD-related targets, AS-related targets and HLXLD-AS-related targets

| 961 HLXLD targets | 1436 AS-related targets | 321 overlapping targets |
|-------------------|-------------------------|-------------------------|
| PGR               | ABCB11                  | MMP2                    |
| NCOA2             | ABCC2                   | EDN1                    |
| PTGS1             | ABCC4                   | HSPB1                   |
| PTGS2             | ABCG2                   | IRAK1                   |
| HSP90AA1          | ALB                     | SUMO1                   |
| KCNH2             | CYP1A1                  | MMP7                    |
| PRKACA            | CYP2C19                 | NOS2                    |
| DRD1              | CYP2C8                  | CACNA2D1                |
| CHRM3             | CYP2C9                  | FGFR1                   |
| CHRM1             | CYP2D6                  | FADS1                   |
| SCN5A             | CYP3A4                  | LEP                     |
| CHRM4             | CYP3A5                  | PTPN22                  |
| PDE3A             | HDAC2                   | CYP2D6                  |
| ADRA1A            | HMGCR                   | S1PR2                   |
| CHRM2             | ITGAL                   | PRKCB                   |
| ADRA1B            | SLC10A1                 | C5AR1                   |
| ADRB2             | SLC15A1                 | CYP2C19                 |
| CHRNA2            | SLC22A8                 | VKORC1                  |
| SLC6A4            | SLC7A11                 | UGT2B7                  |
| OPRM1             | SLCO1A2                 | FOXP3                   |
| CHRNA7            | SLCO1B1                 | GNAS                    |
| BCL2              | SLCO1B3                 | GSTA2                   |
| BAX               | SLCO2B1                 | PTK2                    |
| CASP9             | UGT1A1                  | SHBG                    |
| JUN               | UGT1A3                  | BCL2                    |
| CASP3             | UGT2B7                  | KL                      |
| CASP8             | APOE                    | GCK                     |
| PRKCA             | ATHS                    | F7                      |
| PON1              | APOB                    | EDNRA                   |
| MAP2              | APOA1                   | GHRL                    |
| NR3C2             | ABCA1                   | CYP1A1                  |
| IGHG1             | LDLR                    | MAPK10                  |
| RXRA              | ABCG5                   | PTGES                   |
| NCOA1             | PCSK9                   | FGF1                    |
| ADRA2A            | ABCG8                   | CEL                     |
| SLC6A2            | LIPC                    | CCR3                    |
| SLC6A3            | LMNA                    | AHR                     |
| AKR1B1            | PPARG                   | NFE2L2                  |

|         |          |         |
|---------|----------|---------|
| PLAU    | APOA2    | NR1I3   |
| LTA4H   | CCL2     | KLF4    |
| MAOB    | CRP      | HDAC3   |
| MAOA    | LPA      | ECE1    |
| CTRB1   | CETP     | BMP6    |
| ADRB1   | LPL      | TNFAIP6 |
| F10     | SELE     | CYP19A1 |
| F7      | OLR1     | GC      |
| PTPN1   | IL6      | PDGFRB  |
| PCP4    | PON1     | ADRB1   |
| ADRA1D  | LDLRAP1  | TNF     |
| F2      | ACE      | SIRT2   |
| DPP4    | ADIPOQ   | EGF     |
| GC      | MMP9     | IL1A    |
| SNW1    | NOS3     | CMA1    |
| AR      | VEGFA    | CAV3    |
| NR3C1   | LCAT     | LDLR    |
| NFKB1   | TNF      | JAK2    |
| AKR1C3  | VCAM1    | CASP1   |
| CYP24A1 | MTHFR    | SPP1    |
| GPBAR1  | SERPINE1 | F2      |
| SNAI2   | ICAM1    | WNT5A   |
| MED1    | INS      | APOA2   |
| SNAI1   | TLR4     | PTGS2   |
| CYP3A4  | APOC3    | SQLE    |
| CALB1   | PLA2G7   | NCF1    |
| FGF23   | APOA5    | CYP2C9  |
| GFI1    | IL10     | UTS2R   |
| LANCL2  | PPARA    | CTSK    |
| WNT4    | WRN      | NOTCH2  |
| TCF3    | ELN      | PRKDC   |
| KL      | SMARCA4  | BMP2    |
| CYP2R1  | CYP27A1  | ESR1    |
| PML     | APOC2    | ACE2    |
| B4GALT1 | EDN1     | PDE4D   |
| S100G   | ESR1     | SREBF2  |
| CYP27A1 | AGER     | VEGFA   |
| KANK2   | MPO      | MME     |
| IRX5    | CYP7A1   | MYC     |
| NR1H4   | SCARB1   | VCP     |
| CYP27B1 | PLTP     | GSK3B   |
| VDR     | LDLR-AS1 | MMP1    |
| CNR1    | THBD     | STAT1   |

|          |              |         |
|----------|--------------|---------|
| ADORA1   | IL1B         | MMP12   |
| DGUOK    | EPHX2        | KCNQ1   |
| NPC1L1   | CX3CR1       | PROC    |
| RORC     | VWF          | PTPRC   |
| SHBG     | SELP         | ABCC9   |
| HMGCR    | LEP          | HMGCR   |
| CYP17A1  | LIPA         | PPARD   |
| SREBF2   | AGTR1        | NR3C2   |
| CYP19A1  | DYNC2LI1     | HMOX1   |
| RORA     | MYH11        | GLO1    |
| ESR2     | DOCK6        | MC4R    |
| CYP2C19  | ABCG1        | INS     |
| ACHE     | IL18         | FLT1    |
| SERPINA6 | APOA1-AS     | MMP3    |
| G6PD     | SPP1         | NAMPT   |
| TBXAS1   | NAMPT        | MMP8    |
| PTGES    | HSPD1        | GSTM1   |
| PPARD    | ALOX5        | IL10    |
| SQLE     | RETN         | MAPK1   |
| GLRA1    | CYBA         | CYP27B1 |
| HSD11B1  | MIR6886      | MMP14   |
| PTPN6    | LOC106560211 | PLAT    |
| PTPN2    | MSR1         | MDM2    |
| CES2     | CXCL8        | TNFSF11 |
| PPARG    | GHR          | AKT2    |
| UGT2B7   | CD40         | EGFR    |
| PPARA    | LIPG         | MYLK    |
| DYRK1B   | PON2         | SOD1    |
| MET      | CDKN2B-AS1   | CXCR3   |
| MAPKAPK2 | MMP3         | NR4A1   |
| CDC25A   | PON3         | LGALS3  |
| CDC25B   | ZMPSTE24     | SELPLG  |
| GSK3A    | FABP4        | SMARCA4 |
| CLK4     | SOAT1        | G6PD    |
| SCD      | F3           | MAPK8   |
| BAZ2B    | ITGB3        | F10     |
| BAZ2A    | ANGPTL3      | ACVR1   |
| QPCT     | ENG          | STAR    |
| FLT1     | TP53         | F2R     |
| PDGFRB   | TGFB2        | AKR1B1  |
| FLT4     | ACTA2        | GPER1   |
| IGF1R    | ERCC6        | APLN    |
| PDGFRA   | SMAD3        | CHEK2   |

|         |           |         |
|---------|-----------|---------|
| PTK2    | MGP       | PLA2G7  |
| ROCK2   | TGFB1     | TERT    |
| PLK4    | CELA2A    | CETP    |
| LRRK2   | ENPP1     | SRC     |
| JAK3    | LOX       | RUNX2   |
| JAK1    | BANF1     | TFPI    |
| JAK2    | PLAT      | CXCL10  |
| DCTPP1  | MMP2      | CCL5    |
| MAPK10  | LRP1      | ADAM8   |
| SLC5A2  | TGFBR2    | TP53    |
| TTK     | PPP1R17   | CASP9   |
| TGFBR1  | SREBF2    | CDKN1A  |
| BRAF    | AGT       | LAMP2   |
| TNNI3K  | ERCC1     | ELAVL1  |
| GRK3    | PECAM1    | NCOA2   |
| GRK2    | TNFRSF11B | SOSTDC1 |
| PLK1    | CD14      | PDGFRA  |
| IRAK4   | FBN1      | PREPL   |
| GRK5    | TGFBR1    | NFKB1   |
| HRH3    | HMOX1     | SIRT1   |
| RPS6KA3 | ABCC6     | ABCC1   |
| SLC9A1  | PSEN1     | IL1B    |
| CLK2    | TNFSF4    | REN     |
| PPIA    | LTA       | HPSE    |
| PTK2B   | SMPD1     | NFKBIA  |
| MAPK8   | ERCC8     | IGFBP3  |
| ALOX5   | APOH      | NOD2    |
| BACE1   | XYLT1     | TREM1   |
| KCNA3   | TGFB3     | AMPD2   |
| SRD5A1  | F2        | KISS1   |
| CA12    | IFNG      | P2RX7   |
| CA9     | REN       | GAS6    |
| KCNA5   | MIR155    | GSTM2   |
| ALOX15  | XYLT2     | PLAUR   |
| CA7     | JAK2      | ESR2    |
| CA14    | CD36      | AGTR2   |
| CA13    | PTGS2     | AKT3    |
| CA5B    | TNNT2     | COMT    |
| CBR1    | KCNJ5     | LTA4H   |
| CA6     | CST3      | MEF2C   |
| METAP2  | TUG1      | SOAT2   |
| LIMK1   | F5        | RYR3    |
| CCR9    | AKT1      | COX5A   |

|         |             |        |
|---------|-------------|--------|
| P2RX7   | COL3A1      | TGFB2  |
| PARP2   | F13A1       | PLAU   |
| MTOR    | CAT         | MMP13  |
| HPGDS   | MMP1        | ALOX5  |
| CA1     | H19         | GJA1   |
| CA4     | CD40LG      | FASN   |
| AKR1C1  | LIPE        | MAP3K5 |
| ATM     | NR1H2       | RXRA   |
| BRD4    | NLRP3       | NOS1   |
| TTR     | CREB3L3     | ABCG1  |
| MAP2K1  | APOC4-APOC2 | PTPN11 |
| LYPLA1  | HLA-DRB1    | DPP4   |
| LYPLA2  | TP53COR1    | PON1   |
| CNR2    | MIR145      | ABCA1  |
| CA2     | SAA1        | CSF1   |
| CRHR1   | F7          | CD36   |
| CDK8    | MYLK        | LIPE   |
| GRM1    | MIR21       | CASP8  |
| PTAFR   | PNPLA2      | ARF1   |
| LYN     | SOD2        | PPARG  |
| ROS1    | MAPK14      | ALOX15 |
| MAP3K12 | TLR2        | DMPK   |
| TNK2    | TIMP1       | CALCA  |
| FKBP5   | IL1A        | MAPT   |
| GRM4    | GPIHBP1     | MTTP   |
| GRM5    | NPC1        | CXCL8  |
| SYK     | BGN         | MAPK9  |
| GSK3B   | NFE2L2      | EGR1   |
| UTS2R   | IRAK1       | SELE   |
| HIPK1   | STAT3       | ABCB1  |
| CHEK1   | SIRT1       | CNR1   |
| AVPR1B  | PTPN22      | STAP1  |
| PTGFR   | IGF1        | THBD   |
| KDR     | FCGR2A      | NR3C1  |
| GPR119  | APOA4       | MTOR   |
| PTGER3  | HP          | MAPK14 |
| STS     | NFKB1       | CTSS   |
| GCK     | PRKG1       | RAF1   |
| SMO     | IL1R1       | FURIN  |
| TRAP1   | TNFRSF1A    | CCR2   |
| HSP90B1 | EDNRA       | SDC4   |
| DRD4    | FGF         | MPO    |
| FBP2    | SLC2A10     | PDGFB  |

|         |          |          |
|---------|----------|----------|
| MCHR1   | GJA4     | SCD      |
| DUT     | CDH5     | CHUK     |
| DHFR    | GSTT1    | STAT3    |
| HRH4    | HOXC-AS1 | AMPD1    |
| ALPL    | NFIA-AS1 | TBXAS1   |
| PSENN1  | GSTM1    | TGFBR1   |
| CDK2    | MIR126   | NOX4     |
| CYP1A2  | IL1RN    | CDC42    |
| MPO     | NPPB     | TPM1     |
| HCAR2   | ALOX5AP  | ATM      |
| MAPK14  | MAT2A    | BMP4     |
| CASP7   | MFAP5    | AGTR1    |
| EIF2AK3 | ITGAM    | PPIA     |
| MAPK9   | TNXB     | ADRB2    |
| EPHX1   | JUN      | TYRO3    |
| CMA1    | HULC     | AIF1     |
| PLK2    | MAPT     | SOAT1    |
| SERTAD1 | TXN      | CCL2     |
| CHRM5   | PIK3CG   | ACTN2    |
| OPRD1   | SOD1     | TLR3     |
| TOP2A   | AAT1     | POLB     |
| DRD2    | AAT2     | LTBR     |
| ESR1    | IL17A    | CASP3    |
| PRSS1   | SMAD2    | HSP90AA1 |
| RELA    | SERPINC1 | PARP1    |
| EGFR    | NR1H4    | VDR      |
| AKT1    | CX3CL1   | ACE      |
| CCND1   | SMAD4    | ROCK1    |
| BCL2L1  | NOS2     | CD34     |
| CDKN1A  | SORL1    | FASLG    |
| MMP2    | APOC1    | COL3A1   |
| MMP9    | NR1H3    | RXRG     |
| MAPK1   | TNNI3    | KDR      |
| IL10RB  | IL4      | ABCG2    |
| RB1     | RHOA     | PTPN1    |
| CDK4    | C4A      | PPARA    |
| TNFAIP6 | NBN      | CNR2     |
| IL6ST   | GCLM     | MGLL     |
| TP53    | PPARD    | RORA     |
| NFKBIA  | SREBF1   | TTR      |
| TOP1    | RNF213   | CCR1     |
| MDM2    | MAPK1    | MAOB     |
| APP     | CBS      | LYN      |

|          |           |          |
|----------|-----------|----------|
| MMP1     | CFH       | ELK1     |
| PCNA     | GGCX      | RBP4     |
| ERBB2    | CTNNB1    | MAP2K5   |
| HMOX1    | ALMS1     | IGF2     |
| ICAM1    | MIR499A   | NPC1L1   |
| MCL1     | PTX3      | UTS2     |
| BIRC5    | MIAT      | NQO1     |
| IL2      | CLU       | S1PR1    |
| CCNB1    | GSTA4     | IL2      |
| TYR      | CAV1      | FOS      |
| IFNG     | TNFAIP3   | IFNG     |
| IL4R     | FOS       | HSPA5    |
| XIAP     | PDGFB     | FNDC5    |
| SLC2A4   | AHSG      | CYP27A1  |
| INSR     | SOAT2     | FGF2     |
| CD40LG   | SERPINA3  | ICAM1    |
| NUF2     | CCL5      | CAV1     |
| ADCY2    | CDKN2A    | BCL2L1   |
| CCNA2    | MIR19B1   | SLC9A1   |
| ADRA2C   | CXCL12    | HDAC2    |
| NOS2     | KDR       | IL6ST    |
| STAT3    | KNG1      | HSP90B1  |
| EDNRA    | PDCD1     | HNF4A    |
| DPEP1    | PTGS1     | HIF1A    |
| DRD5     | FGA       | RELA     |
| ADRA2B   | MIR17     | SLC2A4   |
| GABRG3   | VCL       | NOS3     |
| GABRE    | ACTC1     | CFTR     |
| FOS      | NPY       | CAPN5    |
| AHSA1    | FLNC      | NR1H4    |
| FASN     | RAC1      | SERPINE1 |
| MYC      | STAT4     | VCAM1    |
| CYP1A1   | CEL       | PTAFR    |
| NR1I2    | PF4       | INSR     |
| NPM1     | HFE       | ADH1B    |
| ECE1     | MIR210    | JAK1     |
| PARP4    | MMP8      | AKT1     |
| CALCR    | CEP19     | CCR5     |
| ITGB3    | NOX1      | HPX      |
| CACNA2D1 | GP6       | MIF      |
| HSD17B1  | IGFBP3    | ANK3     |
| TFAP2C   | MIR590    | ITGB3    |
| TOX3     | ACTA2-AS1 | HSD11B1  |

|          |          |        |
|----------|----------|--------|
| SHH      | DNMT1    | PTGS1  |
| LEF1     | CD163    | F3     |
| FGFR2    | CTSL     | NR1I2  |
| AREG     | PDE4D    | KCNJ5  |
| GPER1    | CDKN2B   | APOA1  |
| WNT5A    | MAPK8    | LTA    |
| SOX9     | MIR208A  | PSEN1  |
| TRIM24   | PSEN2    | CSF1R  |
| SLC3A2   | BRCC3    | JUN    |
| GABRB2   | FOXE3    | AR     |
| GABRB3   | ZNF687   | BAX    |
| GPR27    | GNB3     | CDH5   |
| CD36     | RAD54L   | PRKCA  |
| SDC4     | GHRL     | CD40LG |
| CD47     | CHIT1    | CES1   |
| BICD1    | LGALS2   | CYP3A4 |
| PDE5A    | HGF      | SCN5A  |
| PDE11A   | MIR140   | TP63   |
| PRKCD    | CCR5     | APP    |
| SCN10A   | NDE1     | FGF23  |
| TRPV3    | FOXP3    | PTGIS  |
| OPRK1    | ADRB2    | CSF2   |
| TRPM8    | CCR2     | MMP9   |
| TRPA1    | HMGB1    | TOP1   |
| TNFSF11  | ERCC4    | RXRΒ   |
| PHB      | SOD3     |        |
| NEDD4    | BLK      |        |
| SERPINB3 | COG2     |        |
| SRC      | MIR33A   |        |
| UBR5     | ALOX15   |        |
| CD34     | MMP12    |        |
| PDGFB    | AKT2     |        |
| GABRA2   | GCLC     |        |
| GABRD    | KLF2     |        |
| CHRNA4   | ETS1     |        |
| GABRB1   | PDGFA    |        |
| GRIN3B   | APLN     |        |
| GRIN2A   | MTTP     |        |
| CYP11A1  | APOL1    |        |
| GABRA3   | TIMP2    |        |
| GABRG1   | PPBP     |        |
| GABRP    | CHEK2    |        |
| GRIA2    | SERPIND1 |        |



|           |          |  |
|-----------|----------|--|
| CDH5      | PAPPA    |  |
| GABRA4    | PPARGC1A |  |
| GRIN2C    | MIR146A  |  |
| GRIN2B    | ABCC9    |  |
| GABRQ     | MYH7     |  |
| ORM1      | SCN5A    |  |
| GRIN3A    | GSTP1    |  |
| GABRA5    | PLA2G2A  |  |
| GABRA6    | NR1I2    |  |
| GABRA1    | MTRR     |  |
| GABRG2    | CSF1     |  |
| GRIN2D    | FGF23    |  |
| CHRFAM7A  | FAS      |  |
| CRBN      | PRKAA2   |  |
| ORM2      | MIF      |  |
| GRIK2     | ANGPTL4  |  |
| GRIN1     | TCF7L2   |  |
| FGF10     | CTLA4    |  |
| APLN      | CHUK     |  |
| TNFRSF11A | AGTR2    |  |
| TP63      | PSMA6    |  |
| LTA       | ITGA2B   |  |
| CHRNA9    | RAF1     |  |
| SERPINB7  | CXCR4    |  |
| GRIK3     | CASP3    |  |
| DCT       | UTS2     |  |
| FBP1      | CD5L     |  |
| SCN2B     | NR3C1    |  |
| GPD1L     | NOTCH1   |  |
| HMGA2     | LCN2     |  |
| CDK5R2    | MSTN     |  |
| NDRG2     | SRC      |  |
| GRIA4     | DCN      |  |
| PAX3      | IL2      |  |
| NAMPT     | SELL     |  |
| APOA2     | PRKAA1   |  |
| DIXDC1    | GPX1     |  |
| RGCC      | SELPLG   |  |
| SEMA4D    | CCL13    |  |
| CSF1R     | CYP11B2  |  |
| CAPN5     | NPPA     |  |
| CD74      | SIRT6    |  |
| SCN3B     | UCP2     |  |

|         |              |  |
|---------|--------------|--|
| FNDC5   | EDNRB        |  |
| NAV2    | SHBG         |  |
| NFIB    | CDH13        |  |
| HPX     | HNF4A        |  |
| ARPIN   | NFKBIA       |  |
| MIF     | FABP2        |  |
| AVPR1A  | TOR2A        |  |
| GRIA1   | UCP1         |  |
| FASLG   | MAPK10       |  |
| CCL5    | NEXN         |  |
| ANK2    | MIR92B       |  |
| LGALS3  | GUCY1A1      |  |
| KLF4    | ITGA2        |  |
| CLDN5   | CCL11        |  |
| FZD2    | THSD1        |  |
| METRNL  | MEF2C        |  |
| ID2     | SLC12A4      |  |
| LILRB1  | SRFBP1       |  |
| NCKAP1L | LIPE-AS1     |  |
| FGF7    | LOC101930071 |  |
| BMP15   | LOC113939944 |  |
| TLR3    | COMT         |  |
| TH      | LRP8         |  |
| SOX17   | TNFSF11      |  |
| BCL11A  | CHI3L1       |  |
| NPR3    | FGG          |  |
| MEF2C   | ESR2         |  |
| MAP2K5  | PGF          |  |
| KCNA1   | ABCA4        |  |
| EIF2AK1 | PTGIS        |  |
| IL1B    | HDAC9        |  |
| DICER1  | PLN          |  |
| PTGIS   | DNASE1       |  |
| SOSTDC1 | BMP4         |  |
| RIPK1   | VKORC1       |  |
| FOXP3   | CASR         |  |
| S1PR2   | KL           |  |
| NPY5R   | ANXA5        |  |
| FADD    | TTN          |  |
| GREM1   | ACE2         |  |
| PLAAT1  | C3           |  |
| HEG1    | IGFBP1       |  |
| ASXL2   | CES1         |  |

|       |          |  |
|-------|----------|--|
| PEX14 | GPT      |  |
| TBR1  | RELA     |  |
| WNT2  | SOCS3    |  |
| HAS2  | NPC2     |  |
| PROC  | XBP1     |  |
| FCER2 | TREM1    |  |
| LEP   | APP      |  |
| WNT2B | CP       |  |
| EGF   | SERPINA1 |  |
| STAP1 | MEF2A    |  |
| TGFB2 | ABCG4    |  |
| TIRAP | LGALS3   |  |
| ADIRF | XDH      |  |
| CHRNE | CXCL16   |  |
| ANK3  | BRCA1    |  |
| KCNE5 | MTR      |  |
| COLQ  | DPP4     |  |
| MMP28 | GP1BA    |  |
| SMAD7 | CAPN10   |  |
| INS   | ITGB2    |  |
| ACE   | ITGB1    |  |
| PHF14 | MAPK3    |  |
| SCN4B | APBB1    |  |
| FGFR4 | SQSTM1   |  |
| GLI3  | MYD88    |  |
| WNT11 | CLEC4A   |  |
| STAR  | ATM      |  |
| CAV3  | IL12A    |  |
| IL10  | BCL2     |  |
| ADCY3 | NPPC     |  |
| CDC20 | SMARCA1  |  |
| RYR3  | ELANE    |  |
| ROCK1 | GGT1     |  |
| PNPT1 | IRF5     |  |
| GRIK5 | GDF15    |  |
| GRIK4 | RARRES2  |  |
| KMT2A | CYBB     |  |
| GRIA3 | CAV2     |  |
| FOXL2 | STAT1    |  |
| NOD2  | GSTO1    |  |
| FZD1  | CCN3     |  |
| BMP4  | CSF2     |  |
| APOA1 | FNDC5    |  |

|        |           |  |
|--------|-----------|--|
| CDC42  | LTA4H     |  |
| MECOM  | STAP1     |  |
| FGFR3  | IKBKG     |  |
| KDM6B  | THBS1     |  |
| RYR2   | HIF1A     |  |
| CPLX2  | HSPA4     |  |
| SRSF6  | MYH6      |  |
| ANXA1  | ALDH2     |  |
| CALCA  | ANTXR1    |  |
| KCNQ1  | TGFBR3    |  |
| CASQ2  | AGXT      |  |
| GRIK1  | HGD       |  |
| PEX5   | ANGPTL6   |  |
| KISS1  | ECE1      |  |
| GRM7   | PMM2      |  |
| CCM2L  | CASP1     |  |
| NOTCH2 | PTEN      |  |
| PROZ   | CYCS      |  |
| AGTR2  | TNFSF10   |  |
| AGTR1  | TFPI      |  |
| CBR4   | PIK3CB    |  |
| PAX2   | VLDLR     |  |
| DAB2   | C4B       |  |
| WLS    | FAM186A   |  |
| ACTN2  | MIR193B   |  |
| ADCY6  | MIR1306   |  |
| CSF1   | MIR660    |  |
| IL34   | LINC01362 |  |
| UTS2   | LINC00400 |  |
| WT1    | LINC01361 |  |
| HNF1B  | C5        |  |
| COMT   | MECP2     |  |
| PKD2   | IL33      |  |
| AQP2   | FGF21     |  |
| MC4R   | MIR10A    |  |
| CRHBP  | ABCB1     |  |
| ACE2   | USF1      |  |
| BMP6   | PHACTR1   |  |
| SIPA1  | MIR182    |  |
| AMELX  | CYP7B1    |  |
| EGR1   | ROCK1     |  |
| GAS6   | CSF3      |  |
| TFPI   | RSAD2     |  |

|         |         |  |
|---------|---------|--|
| KCNK4   | IL13    |  |
| CCS     | IKBKB   |  |
| ARRB1   | ITGAV   |  |
| AIF1    | FASLG   |  |
| NMUR2   | BMPR2   |  |
| ACSL4   | KLF4    |  |
| RET     | MYBPC3  |  |
| MC5R    | NKX2-5  |  |
| MC3R    | HAND2   |  |
| NCK2    | VTN     |  |
| NCK1    | ADM     |  |
| IMPDH1  | CR2     |  |
| IMPDH2  | NCF1    |  |
| CHRNA10 | NOX4    |  |
| ACVR1   | CCL3    |  |
| ADCY1   | GCK     |  |
| AMHR2   | NOS1    |  |
| TNKS2   | FN1     |  |
| ABL2    | PIK3CA  |  |
| ABCC9   | IL1R2   |  |
| ABL1    | SDC4    |  |
| CDK15   | MBL2    |  |
| ACSL1   | TIMP3   |  |
| ABCA1   | CDKN1A  |  |
| ABCC8   | APOM    |  |
| ALK     | PTH     |  |
| ABCG1   | TLR9    |  |
| ARAF    | CXCL10  |  |
| AKT3    | POLR1C  |  |
| AKT2    | NINJ1   |  |
| ADA     | ANKRD1  |  |
| ITFG2   | FLT1    |  |
| TBXA2R  | FABP3   |  |
| PLA2G5  | CXCL1   |  |
| ELAVL1  | ADD1    |  |
| HSD17B3 | CYP2J2  |  |
| HDAC2   | IL20    |  |
| SAE1    | F8      |  |
| KAT2B   | AGXT2   |  |
| CCR1    | BGLAP   |  |
| CYP2D6  | PLA2G1B |  |
| HNF4A   | SUPT3H  |  |
| LDLR    | PLA2G10 |  |

|         |           |  |
|---------|-----------|--|
| NOX4    | CHST1     |  |
| PTPN11  | PARP1     |  |
| PTPRC   | MTOR      |  |
| NQO2    | IL37      |  |
| CES1    | MMP14     |  |
| TERT    | MMP13     |  |
| BRD2    | FCGR3B    |  |
| BRD3    | ALOX12    |  |
| PABPC1  | SLC2A9    |  |
| PTGER2  | TFEB      |  |
| CDC25C  | KIAA0319L |  |
| BRS3    | BSG       |  |
| IDH1    | S100A12   |  |
| EIF4H   | GAS6      |  |
| TNF     | MYOCD     |  |
| POLB    | H2AC18    |  |
| TUBB1   | ANGPT1    |  |
| CA3     | MC4R      |  |
| CA5A    | FDFT1     |  |
| FUT7    | GRAMD1C   |  |
| GLO1    | F2R       |  |
| MMP12   | SOCS1     |  |
| CYP1B1  | SLC2A4    |  |
| ABCG2   | ACVRL1    |  |
| AKR1B10 | DES       |  |
| TNKS    | ARID5B    |  |
| PTPRS   | AR        |  |
| ABCC1   | CTSB      |  |
| CDK6    | PRKDC     |  |
| ABCB1   | SDC2      |  |
| CFTR    | GCKR      |  |
| GRK6    | B2M       |  |
| CDK1    | DUSP1     |  |
| AHR     | CPE       |  |
| ESRRA   | LIPI      |  |
| GPR35   | SULT1A3   |  |
| AVPR2   | MAPK7     |  |
| DAPK1   | CD86      |  |
| MMP13   | SLC17A4   |  |
| MMP3    | CXCR2     |  |
| AXL     | EGR1      |  |
| NUAK1   | AHSP      |  |
| PFKFB3  | EGFR      |  |

|          |          |  |
|----------|----------|--|
| PLGLA    | PROC     |  |
| KDM4E    | LAMP2    |  |
| PREPL    | MIR196A2 |  |
| FABP1    | VDR      |  |
| ACP1     | MALAT1   |  |
| CD81     | TNFRSF1B |  |
| PTPN22   | COX5A    |  |
| PHOSPHO1 | HSP90AA1 |  |
| GPR39    | PAOD1    |  |
| VCAM1    | MFGE8    |  |
| PBRM1    | ACTN2    |  |
| SMARCA4  | CSRP3    |  |
| VCP      | PLCG1    |  |
| MMP8     | CD34     |  |
| MPI      | BDNF     |  |
| PRF1     | GSR      |  |
| NR4A1    | HELLS    |  |
| ATP2A1   | SLC10A2  |  |
| GSTM1    | RYR3     |  |
| TTL      | COL4A1   |  |
| IARS1    | MME      |  |
| DUSP3    | TERT     |  |
| CAPN1    | PLG      |  |
| CTSG     | MIR33B   |  |
| PER2     | IL2RA    |  |
| CASP1    | ITLN1    |  |
| VAV1     | LBP      |  |
| CASP6    | TNFSF12  |  |
| DNTT     | MAPK12   |  |
| C5AR1    | TRAF6    |  |
| FGFR1    | RHOD     |  |
| MUSK     | PLAUR    |  |
| CTSK     | IL15     |  |
| CTSS     | TP63     |  |
| KIF11    | FCGR2B   |  |
| PRMT3    | GALT     |  |
| CYP2C9   | EIF2B2   |  |
| NUDT1    | UBE2L3   |  |
| GCGR     | CLCN1    |  |
| F2R      | BRDT     |  |
| TYMS     | PEX6     |  |
| MAP3K11  | ATRIP    |  |
| LIPE     | STAG3    |  |

|         |             |  |
|---------|-------------|--|
| ST6GAL1 | TREX1       |  |
| MAP3K14 | CCT7        |  |
| CCR5    | PREPL       |  |
| S1PR1   | TNIP1       |  |
| MAP3K5  | JAZF1       |  |
| PRCP    | PXK         |  |
| MALT1   | BANK1       |  |
| NAT1    | MSH4        |  |
| TDP2    | INSL6       |  |
| HDAC6   | SGO2        |  |
| HDAC3   | ATRIP-TREX1 |  |
| HDAC8   | SLEB3       |  |
| HDAC1   | CHDS1       |  |
| FAP     | CHDS2       |  |
| CFD     | CHDS3       |  |
| MMP14   | CHDS4       |  |
| CPT1A   | CHDS8       |  |
| FKBP1A  | CHDS9       |  |
| TDO2    | SLEB4       |  |
| CAPN2   | SLEB5       |  |
| GPR139  | SLEB7       |  |
| CDK9    | SLEB8       |  |
| CCR3    | SLEB15      |  |
| PPOX    | SLEB12      |  |
| HRH2    | SLEB13      |  |
| ACP3    | SLEB14      |  |
| OPRL1   | MCI2        |  |
| AMPD3   | FBLN5       |  |
| PTGER1  | CCDC71L     |  |
| KDM4C   | CYP46A1     |  |
| CTSC    | ANGPT2      |  |
| DHODH   | IL12B       |  |
| PTGER4  | IRS2        |  |
| PLAUR   | CD59        |  |
| FADS1   | NR4A3       |  |
| ALKBH3  | AOC3        |  |
| KCNK3   | ABCA12      |  |
| KCNK9   | SPEG        |  |
| S1PR3   | NR3C2       |  |
| NR1I3   | SCAP        |  |
| AMPD1   | LMF1        |  |
| LDHA    | HTR2A       |  |
| LDHB    | MIR221      |  |



|          |              |  |
|----------|--------------|--|
| MME      | DSP          |  |
| AMPD2    | TPM1         |  |
| SELPLG   | DMD          |  |
| CAMKK2   | DSG2         |  |
| THRA     | SGCD         |  |
| KDM3A    | TMPO         |  |
| MKNK2    | BAG3         |  |
| NEU3     | EYA4         |  |
| HDAC4    | TCAP         |  |
| GSTM2    | TSFM         |  |
| UQCRB    | LDB3         |  |
| MGLL     | TMEM43       |  |
| MAP3K8   | HEY2         |  |
| VEGFA    | PPP1R13L     |  |
| FGF1     | NDUFAF2      |  |
| FGF2     | FKTN         |  |
| HPSE     | RBM20        |  |
| NAE1     | CEP85L       |  |
| MPG      | TAFAZZIN     |  |
| SLC22A12 | PGBD3        |  |
| ODC1     | HAND2-AS1    |  |
| ESRRB    | TTN-AS1      |  |
| ADCY10   | DSG2-AS1     |  |
| GPR55    | MHRT         |  |
| GPR18    | ERCC8-AS1    |  |
| SLC22A2  | LOC106780803 |  |
| SRD5A2   | MYMY4        |  |
| CXCR3    | SP1          |  |
| CXCL8    | TTR          |  |
| PRKCB    | ADAM17       |  |
| IGF2     | GAS5         |  |
| GSTA2    | MASP2        |  |
| EIF6     | ADAMTS1      |  |
| ELK1     | SPARC        |  |
| RAF1     | P2RY12       |  |
| SOD1     | TLR7         |  |
| HIF1A    | ABCC1        |  |
| STAT1    | KEAP1        |  |
| RUNX1T1  | AKR1B1       |  |
| HSPA5    | GSTM3        |  |
| ACACA    | GSTM2        |  |
| CAV1     | GSTM5        |  |
| F3       | GSTM4        |  |

|          |           |  |
|----------|-----------|--|
| GJA1     | PRTN3     |  |
| CCL2     | SORT1     |  |
| SELE     | RHBDF2    |  |
| DUOX2    | RBP4      |  |
| NOS3     | AHR       |  |
| HSPB1    | CLEC1A    |  |
| PLAT     | HSPA14    |  |
| THBD     | NUDCD1    |  |
| SERPINE1 | S100A9    |  |
| IL1A     | NOS1AP    |  |
| NCF1     | PROCR     |  |
| NFE2L2   | CYP2E1    |  |
| NQO1     | ADPRH     |  |
| PARP1    | ADAMTS7   |  |
| PSMD3    | NRG1      |  |
| COL3A1   | NQO1      |  |
| CXCL11   | G6PC2     |  |
| CXCL2    | LRP6      |  |
| DCAF5    | ALOX15B   |  |
| CHEK2    | GCG       |  |
| CLDN4    | ABO       |  |
| HSF1     | SLC30A8   |  |
| CXCL10   | PRKCB     |  |
| CHUK     | MB        |  |
| SPP1     | PTK2      |  |
| RUNX2    | PNLIP     |  |
| RASSF1   | SAA4      |  |
| E2F1     | MMP7      |  |
| E2F2     | FTO       |  |
| CTSD     | IL6R      |  |
| IGFBP3   | PLAU      |  |
| IRF1     | SERPINF1  |  |
| ERBB3    | TERF2     |  |
| DIO1     | ARG2      |  |
| PCOLCE   | THBS4     |  |
| NPEPPS   | LIPF      |  |
| HK2      | CTH       |  |
| RASA1    | MIR92A1   |  |
| CSNK2A1  | EGF       |  |
| CRYZL1   | CXCL9     |  |
| VKORC1   | PTPN1     |  |
| TRPV1    | MIR214    |  |
| FADS2    | SERPINA12 |  |

|       |         |  |
|-------|---------|--|
| PDE7B | MIR34A  |  |
| PDE9A | BMP2    |  |
| PDE4A | POMC    |  |
| RYR1  | XRCC5   |  |
| ITPR1 | BMP6    |  |
| PDE6A | KISS1   |  |
| PRKDC | LTB4R   |  |
| PDE3B | PINX1   |  |
| PDE1A | BAX     |  |
| PDE4D | MIR122  |  |
| ITPR2 | TAGLN   |  |
| PDE1B | PRL     |  |
| PDE7A | TNFRSF4 |  |
| ITPR3 | HSP90B1 |  |
| PDE4C | IFNA1   |  |
| PDE1C | LEPR    |  |
| PDE6B | FOXO3   |  |
| PDE4B | PALLD   |  |
| PDE2A | BHMT    |  |
| PDE8B | APCS    |  |
| PDE6C | FUT3    |  |
| PDE8A | F9      |  |
| RINT1 | SLC9A1  |  |
| HAP1  | CXCR3   |  |
| PRLR  | RECK    |  |
| ACTN3 | CNR1    |  |
| TACC1 | ADIPOR1 |  |
| SIRT1 | HSPA5   |  |
| DGKI  | FOXO1   |  |
| FURIN | HNF1A   |  |
| STUB1 | NCF2    |  |
| CTR9  | IRS1    |  |
| SIX1  | CACNA1C |  |
| SYT2  | TET2    |  |
| SIX4  | DNAH8   |  |
| SIRT2 | SLC17A5 |  |
| SPI1  | S100A8  |  |
| XRCC4 | MAP3K5  |  |
| UBE2B | MACROD2 |  |
| HCN4  | FURIN   |  |
| EDN1  | MERTK   |  |
| CETN2 | GRN     |  |
| CETN1 | NOD2    |  |

|         |           |  |
|---------|-----------|--|
| NUDT9   | CCR7      |  |
| BMP2    | RXRA      |  |
| FER     | TNFRSF10A |  |
| KCNB1   | MIR29A    |  |
| ADAM8   | IGF2      |  |
| VTI1A   | MTNR1B    |  |
| ADAP2   | TPO       |  |
| AURKA   | ARG1      |  |
| MCM3    | LPXN      |  |
| GHRL    | INSIG2    |  |
| HIPK2   | POSTN     |  |
| TET1    | NPC1L1    |  |
| C2CD5   | THBS2     |  |
| CSF2    | HTRA1     |  |
| KIT     | MT-CYB    |  |
| BNIP3   | IRF7      |  |
| GATA3   | PIK3R1    |  |
| ZFP42   | MAPK9     |  |
| UCN2    | TNC       |  |
| RAB8B   | MTHFD1    |  |
| DKK3    | CCL4      |  |
| AQP1    | CALR      |  |
| DPPA3   | HBEGF     |  |
| CASQ1   | ADORA2A   |  |
| HPS4    | FGF2      |  |
| TKT     | PIK3C2A   |  |
| ADAP1   | SCD       |  |
| EDA     | VEGFB     |  |
| SELENOP | PRKAG2    |  |
| NOS1    | CD44      |  |
| TREM1   | SRF       |  |
| TAL1    | TSPO      |  |
| PAWR    | PDGFRA    |  |
| BMP5    | FCAMR     |  |
| RTN2    | INSR      |  |
| CD63    | CD68      |  |
| LAMP2   | ADH1C     |  |
| GLYR1   | HSPB1     |  |
| GNAS    | IDO1      |  |
| NCBP2   | MIR142    |  |
| TPM1    | F13B      |  |
| PCSK6   | NECTIN2   |  |
| REST    | COL8A1    |  |

|        |          |  |
|--------|----------|--|
| HCN2   | CHST2    |  |
| NFX1   | XRCC6    |  |
| SOAT1  | PRKAB1   |  |
| ADH1A  | NR4A1    |  |
| COX6C  | KCNQ1    |  |
| COX5B  | CD4      |  |
| COX7C  | GSK3B    |  |
| ADH1B  | CTSS     |  |
| COX5A  | TRAF2    |  |
| ADA2   | PTGDS    |  |
| COX7B  | CCN2     |  |
| COX8A  | PIGR     |  |
| HIBCH  | MGLL     |  |
| PIM1   | MIR30C1  |  |
| HCK    | MDM2     |  |
| CALY   | ABCA7    |  |
| GLRA2  | JAK1     |  |
| KCNJ3  | TNFSF13B |  |
| KCNJ6  | ACTG1    |  |
| KCNJ5  | MIR30A   |  |
| KCNJ9  | ATF3     |  |
| SOAT2  | VCP      |  |
| MTTP   | PLIN1    |  |
| HSPA1L | MAP3K7   |  |
| DAO    | MAP2K4   |  |
| SNCA   | PIK3R3   |  |
| MAPT   | H2AX     |  |
| MYLK   | PLA2G2D  |  |
| ATP12A | IL6ST    |  |
| PTGIR  | F11R     |  |
| FFAR1  | OSM      |  |
| LTB4R  | KLF5     |  |
| AKR1C2 | NEBL     |  |
| RBP4   | PROS1    |  |
| DAGLA  | AMPD1    |  |
| CEL    | SAMSN1   |  |
| ABHD6  | HHIPL1   |  |
| PLA2G7 | ACTB     |  |
| BACE2  | ELAVL1   |  |
| ACACB  | GNAS     |  |
| ITK    | ACTA1    |  |
| REN    | GC       |  |
| BTK    | CREB1    |  |

|         |         |  |
|---------|---------|--|
| ACER2   | YAP1    |  |
| CCR2    | SOST    |  |
| ASAH1   | CALCA   |  |
| CALCRL  | PPP1R3A |  |
| ARF1    | MMP10   |  |
| MDM4    | ABCA3   |  |
| TYRO3   | CD274   |  |
| SUMO1   | MIR222  |  |
| HIPK4   | PTPRC   |  |
| SBK1    | PPIA    |  |
| DAPK3   | HSPA12B |  |
| CDK7    | TLR6    |  |
| RPS6KA4 | FMN2    |  |
| IRAK1   | PLIN2   |  |
| STK17B  | CMA1    |  |
| STK10   | EP300   |  |
| EPHA5   | NGF     |  |
| EPHA8   | GJA1    |  |
| SLK     | HSPA1A  |  |
| FRK     | ID3     |  |
| STK36   | SRA1    |  |
| TXK     | CAMP    |  |
| STK17A  | SCNN1A  |  |
| EPHA6   | C2      |  |
| EPHA3   | ATG9B   |  |
| EPHB1   | RPA1    |  |
| IRAK3   | TRAF1   |  |
| MAPK6   | CDC42   |  |
| DMPK    | PDGFRB  |  |
| NLK     | FCGR3A  |  |
| MINK1   | SAA2    |  |
| CIT     | RTN4    |  |
| LTK     | CXCL13  |  |
| NUAK2   | HABP2   |  |
| SIK2    | C1QTNF9 |  |
| MAPK4   | HPSE    |  |
| EPHA1   | ST3GAL4 |  |
| MAP3K2  | ADAMTS4 |  |
| MAP3K3  | COL5A1  |  |
| DCLK3   | GPBP1   |  |
| MAP3K19 | ACP5    |  |
| PAM     | TNFRSF9 |  |
| P2RX3   | MCAM    |  |

|          |          |  |
|----------|----------|--|
| MAST3    | ITGA4    |  |
| AURKAIP1 | MYLIP    |  |
| PTGDR    | WDFY4    |  |
| SLC5A1   | IL5      |  |
| EIF4A1   | KCNJ11   |  |
| SLC28A3  | CACNA2D1 |  |
| MMP7     | MIR143   |  |
| HRH1     | CCR1     |  |
| CENPE    | MEFV     |  |
| HAO1     | LBR      |  |
| KDM2A    | APLNR    |  |
| PHF8     | DDAH2    |  |
| KDM5C    | LAMA4    |  |
| PSEN1    | RXRG     |  |
| RXRB     | TRIB3    |  |
| RXRG     | APOD     |  |
| MC1R     | LY96     |  |
| EPAS1    | KISS1R   |  |
| CETP     | C5AR1    |  |
| LSS      | IL32     |  |
|          | CYP19A1  |  |
|          | CCL15    |  |
|          | FGF19    |  |
|          | CXCR6    |  |
|          | PRKCZ    |  |
|          | TFAP2A   |  |
|          | NOTCH3   |  |
|          | CD28     |  |
|          | CSF1R    |  |
|          | ZNF202   |  |
|          | CALM1    |  |
|          | SDC1     |  |
|          | TOP1     |  |
|          | FEN1     |  |
|          | BMPR1B   |  |
|          | TRPV4    |  |
|          | AGPAT2   |  |
|          | ADH1B    |  |
|          | GRK4     |  |
|          | LEPQTL1  |  |
|          | RXRB     |  |
|          | EIF2S1   |  |
|          | RUNX2    |  |

|  |          |  |
|--|----------|--|
|  | WWTR1    |  |
|  | BCL2L1   |  |
|  | CDKN1B   |  |
|  | TNFSF13  |  |
|  | F11      |  |
|  | CNR2     |  |
|  | UCP3     |  |
|  | RGS2     |  |
|  | LTB4R2   |  |
|  | CARD8    |  |
|  | HS3ST1   |  |
|  | SUCNR1   |  |
|  | LPAL2    |  |
|  | PTGES    |  |
|  | XPA      |  |
|  | BSCL2    |  |
|  | SYNE2    |  |
|  | MIR199A1 |  |
|  | ADRB3    |  |
|  | HMCN1    |  |
|  | ADAM10   |  |
|  | BLM      |  |
|  | MAP2K6   |  |
|  | CALM3    |  |
|  | CASP8    |  |
|  | MIR30C2  |  |
|  | SST      |  |
|  | LYN      |  |
|  | RAC2     |  |
|  | PLIN3    |  |
|  | GCH1     |  |
|  | SORCS1   |  |
|  | HAMP     |  |
|  | DGAT1    |  |
|  | HLA-DQB1 |  |
|  | PSRC1    |  |
|  | ICMT     |  |
|  | FEM1A    |  |
|  | FADS1    |  |
|  | SGCB     |  |
|  | CDKN1C   |  |
|  | IGFBP2   |  |
|  | ATF4     |  |



|  |          |  |
|--|----------|--|
|  | GAPDH    |  |
|  | RECQL4   |  |
|  | AKT3     |  |
|  | MAPK13   |  |
|  | MAP2K7   |  |
|  | HSP90AB1 |  |
|  | IFNB1    |  |
|  | PRKCE    |  |
|  | APEX1    |  |
|  | ACVR1    |  |
|  | ACVR2A   |  |
|  | ABCD1    |  |
|  | CRYAA    |  |
|  | M6PR     |  |
|  | CH25H    |  |
|  | UTS2R    |  |
|  | TFPI2    |  |
|  | IL23R    |  |
|  | MIR19A   |  |
|  | PTPN11   |  |
|  | RAP1A    |  |
|  | RAP1B    |  |
|  | NFKBIB   |  |
|  | LMNB1    |  |
|  | SYNE3    |  |
|  | LIAS     |  |
|  | GHSR     |  |
|  | PCSK5    |  |
|  | FASN     |  |
|  | NAT2     |  |
|  | ADAMTSL1 |  |
|  | MAOB     |  |
|  | C9orf72  |  |
|  | CYP2B6   |  |
|  | ITGA5    |  |
|  | GLP1R    |  |
|  | IL23A    |  |
|  | VCAN     |  |
|  | SAMD1    |  |
|  | GPR132   |  |
|  | CD80     |  |
|  | EMD      |  |
|  | CBX5     |  |

|  |         |  |
|--|---------|--|
|  | LMNB2   |  |
|  | CIDEC   |  |
|  | SYNE1   |  |
|  | SUN1    |  |
|  | SUN2    |  |
|  | HBB     |  |
|  | WNT5A   |  |
|  | TEK     |  |
|  | CD69    |  |
|  | ERN1    |  |
|  | POU2F1  |  |
|  | CXCL3   |  |
|  | S1PR1   |  |
|  | SIRT2   |  |
|  | ATP2A2  |  |
|  | TPM2    |  |
|  | PNPLA3  |  |
|  | PRDX5   |  |
|  | ZFPM2   |  |
|  | NEAT1   |  |
|  | GPB1    |  |
|  | ARMS2   |  |
|  | RORA    |  |
|  | CTSK    |  |
|  | ILK     |  |
|  | BRAP    |  |
|  | CYP27B1 |  |
|  | ADRB1   |  |
|  | PLA2G3  |  |
|  | TRIB1   |  |
|  | SH2B3   |  |
|  | GDF2    |  |
|  | IRF2BP2 |  |
|  | CFTR    |  |
|  | RAD51   |  |
|  | MLH1    |  |
|  | POLB    |  |
|  | EXO1    |  |
|  | TERF1   |  |
|  | MRE11   |  |
|  | RAD52   |  |
|  | RECQL   |  |
|  | DHX9    |  |

|  |              |  |
|--|--------------|--|
|  | RECQL5       |  |
|  | WRNIP1       |  |
|  | PURG         |  |
|  | PIK3CD       |  |
|  | PIK3R2       |  |
|  | MAPK11       |  |
|  | CALM2        |  |
|  | CALML3       |  |
|  | CALML5       |  |
|  | CALML4       |  |
|  | CALML6       |  |
|  | ICOS         |  |
|  | ASS1         |  |
|  | C1S          |  |
|  | MIR29B1      |  |
|  | TYRO3        |  |
|  | MCPH1        |  |
|  | ARF1         |  |
|  | ABHD5        |  |
|  | PITPNA       |  |
|  | PNPLA5       |  |
|  | LIPK         |  |
|  | LIPJ         |  |
|  | LIPM         |  |
|  | VSTM4        |  |
|  | LOC121331340 |  |
|  | HLA-DQA1     |  |
|  | CAVIN1       |  |
|  | SLC2A1       |  |
|  | F2RL1        |  |
|  | SSTR2        |  |
|  | IGF2BP2      |  |
|  | CDKAL1       |  |
|  | MTHFD1L      |  |
|  | MARS1        |  |
|  | TLR1         |  |
|  | DKK1         |  |
|  | PCSK2        |  |
|  | HSPB2        |  |
|  | CCR3         |  |
|  | CD79A        |  |
|  | RICTOR       |  |
|  | SERPINF2     |  |

|  |          |  |
|--|----------|--|
|  | ADORA2B  |  |
|  | S1PR2    |  |
|  | MT2A     |  |
|  | APOBEC1  |  |
|  | HPX      |  |
|  | LTBP1    |  |
|  | CD55     |  |
|  | IL19     |  |
|  | NR4A2    |  |
|  | TGM2     |  |
|  | CTNNA1   |  |
|  | CXADR    |  |
|  | COPS5    |  |
|  | FMO3     |  |
|  | CCL19    |  |
|  | MIR181B1 |  |
|  | CSN1S1   |  |
|  | CANT1    |  |
|  | ATF6     |  |
|  | MAP2K5   |  |
|  | GSTO2    |  |
|  | PIAS4    |  |
|  | ACAN     |  |
|  | PRPS1    |  |
|  | RFC1     |  |
|  | LAMA1    |  |
|  | TP53BP1  |  |
|  | LPAR3    |  |
|  | RAN      |  |
|  | ANK3     |  |
|  | SPG7     |  |
|  | TWIST2   |  |
|  | UBA7     |  |
|  | LEMD3    |  |
|  | NUP153   |  |
|  | NAT10    |  |
|  | CLMP     |  |
|  | RCE1     |  |
|  | MIR9-1   |  |
|  | TLR3     |  |
|  | MIR30E   |  |
|  | MIR144   |  |
|  | FABP5    |  |

|  |             |  |
|--|-------------|--|
|  | TBK1        |  |
|  | PTAFR       |  |
|  | LDB2        |  |
|  | IL9         |  |
|  | IFNA2       |  |
|  | IL20RA      |  |
|  | FST         |  |
|  | SERPING1    |  |
|  | AMH         |  |
|  | CXCR5       |  |
|  | IGF2-AS     |  |
|  | MIR99A      |  |
|  | EFEMP1      |  |
|  | LTB         |  |
|  | MIR150      |  |
|  | PRDM16      |  |
|  | MIR223      |  |
|  | HBA1        |  |
|  | CAV3        |  |
|  | GLB1        |  |
|  | HSD11B1     |  |
|  | PDGFC       |  |
|  | NFKB2       |  |
|  | LRP5        |  |
|  | SLC11A1     |  |
|  | MIR124-1HG  |  |
|  | JUP         |  |
|  | CTNNA3      |  |
|  | SYNM        |  |
|  | ITIH4       |  |
|  | F10         |  |
|  | TBX20       |  |
|  | BCAR1       |  |
|  | MIR92A2     |  |
|  | TNFAIP6     |  |
|  | BMPER       |  |
|  | lnc-KDM5D-4 |  |
|  | IFNGR2      |  |
|  | TCN2        |  |
|  | KCNK1       |  |
|  | MS4A2       |  |
|  | ADAM33      |  |
|  | INSIG1      |  |

|  |         |  |
|--|---------|--|
|  | LGMN    |  |
|  | MIR19B2 |  |
|  | G6PD    |  |
|  | SFTPD   |  |
|  | KIF6    |  |
|  | FPR2    |  |
|  | IL24    |  |
|  | SUMO1   |  |
|  | GPC1    |  |
|  | CTF1    |  |
|  | CHGA    |  |
|  | CACNA1H |  |
|  | IFNGR1  |  |
|  | DMPK    |  |
|  | PRKAG1  |  |
|  | PAX6    |  |
|  | SCNN1B  |  |
|  | AMPD2   |  |
|  | PRKAB2  |  |
|  | SCNN1G  |  |
|  | RGS9    |  |
|  | CAPN5   |  |
|  | MSH3    |  |
|  | PDYN    |  |
|  | MYO7A   |  |
|  | PRKAG3  |  |
|  | CMKLR1  |  |
|  | PLEKHA1 |  |
|  | TCN1    |  |
|  | BHMT2   |  |
|  | KCNK2   |  |
|  | PGLYRP1 |  |
|  | NFKBIE  |  |
|  | MIA3    |  |
|  | MRPL10  |  |
|  | TSLP    |  |
|  | FEM1B   |  |
|  | OLFML2B |  |
|  | RGS9BP  |  |
|  | F12     |  |
|  | CASP9   |  |
|  | DDIT3   |  |
|  | TAT     |  |

|  |                   |  |
|--|-------------------|--|
|  | CCDC92            |  |
|  | NOTCH2            |  |
|  | ORAI1             |  |
|  | CD70              |  |
|  | FCN2              |  |
|  | MIR638            |  |
|  | RELN              |  |
|  | SCARB2            |  |
|  | FMOD              |  |
|  | OGN               |  |
|  | NCOA2             |  |
|  | AIF1              |  |
|  | SELENOS           |  |
|  | HSD3B7            |  |
|  | FDX1              |  |
|  | PRKCA             |  |
|  | TF                |  |
|  | STK11             |  |
|  | NUMB              |  |
|  | HYAL1             |  |
|  | ADAMTS5           |  |
|  | LCT               |  |
|  | ABI2              |  |
|  | DNAH5             |  |
|  | LECT2             |  |
|  | LRRC18            |  |
|  | UTP20             |  |
|  | EPO               |  |
|  | DNM2              |  |
|  | LRIG1             |  |
|  | ZHX2              |  |
|  | RPL21P41          |  |
|  | HBP1              |  |
|  | CBL1              |  |
|  | LINC02577         |  |
|  | ENSG00000243797   |  |
|  | ENSG00000267052   |  |
|  | PRMT5P1           |  |
|  | HSALNG0060378-001 |  |
|  | lnc-PIK3CG-6      |  |
|  | HSALNG0060385     |  |
|  | APOBR             |  |
|  | IFIH1             |  |

|  |         |  |
|--|---------|--|
|  | HAVCR1  |  |
|  | SLAMF7  |  |
|  | ZFHX3   |  |
|  | GPD1    |  |
|  | DPH3    |  |
|  | P2RX7   |  |
|  | MIR216A |  |
|  | LYVE1   |  |
|  | IBSP    |  |
|  | FRS2    |  |
|  | NOX5    |  |
|  | GZMB    |  |
|  | SERPIN1 |  |
|  | ANGPTL2 |  |
|  | CCL21   |  |
|  | CUBN    |  |
|  | POU2F3  |  |
|  | SCARA3  |  |
|  | SDHB    |  |
|  | PRKAR1A |  |
|  | RPS6KA1 |  |
|  | RALBP1  |  |
|  | CNTN1   |  |
|  | ADAM8   |  |
|  | ZBTB20  |  |
|  | CXCL5   |  |
|  | PAFAH2  |  |
|  | TUSC1   |  |
|  | CDKN3   |  |
|  | TBXAS1  |  |
|  | ELK1    |  |
|  | HSPA8   |  |
|  | TXNRD1  |  |
|  | IL17B   |  |
|  | CIITA   |  |
|  | ACVR2B  |  |
|  | BMPR1A  |  |
|  | ARHGEF2 |  |
|  | RAC3    |  |
|  | TXN2    |  |
|  | GSTA3   |  |
|  | MGST2   |  |
|  | GSTA1   |  |



|  |          |  |
|--|----------|--|
|  | GSTA2    |  |
|  | MGST1    |  |
|  | MGST3    |  |
|  | SUMO3    |  |
|  | SUMO4    |  |
|  | SUMO2    |  |
|  | GSTA5    |  |
|  | GSTT2B   |  |
|  | GSTT2    |  |
|  | GH1      |  |
|  | NFAT5    |  |
|  | CCL1     |  |
|  | FABP12   |  |
|  | NR1I3    |  |
|  | STAR     |  |
|  | GLO1     |  |
|  | KCNN4    |  |
|  | NFATC2   |  |
|  | HDAC3    |  |
|  | ACKR3    |  |
|  | LRRIQ3   |  |
|  | IRF3     |  |
|  | VEGFC    |  |
|  | GATA4    |  |
|  | MT-ATP6  |  |
|  | MIR217   |  |
|  | MIR212   |  |
|  | PRNP     |  |
|  | IL27     |  |
|  | ITGAX    |  |
|  | MIRLET7G |  |
|  | FLACC1   |  |
|  | OTSC6    |  |
|  | OTSC9    |  |
|  | OTSC1    |  |
|  | OTSC2    |  |
|  | OTSC3    |  |
|  | OTSC4    |  |
|  | OTSC7    |  |
|  | OTSC5    |  |
|  | MPV17    |  |
|  | TSC1     |  |
|  | MS       |  |

|  |         |  |
|--|---------|--|
|  | ALS5    |  |
|  | ALS3    |  |
|  | C2CD6   |  |
|  | CARF    |  |
|  | RAPH1   |  |
|  | ALS2    |  |
|  | TSC2    |  |
|  | SOSTDC1 |  |
|  | TYS     |  |
|  | ZNRD2   |  |
|  | EXOSC9  |  |
|  | EXOSC10 |  |
|  | FGFR1   |  |
|  | SQLE    |  |
|  | HTR1A   |  |
|  | HTR2B   |  |
|  | FGF1    |  |
|  | MYC     |  |
|  | CFB     |  |
|  | GRIA    |  |
|  | p38     |  |
|  | PK      |  |

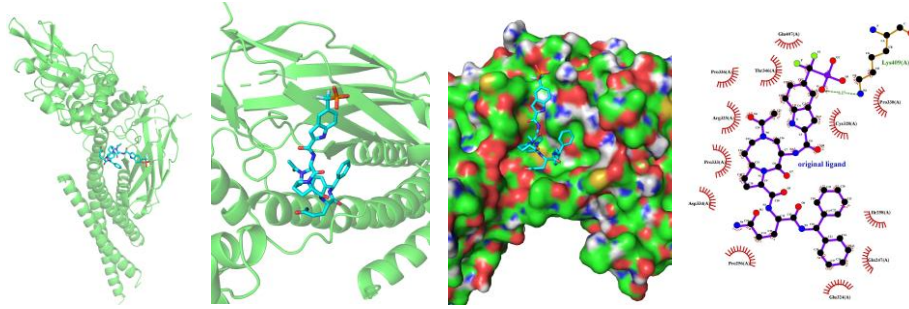

1. STAT3- original ligand

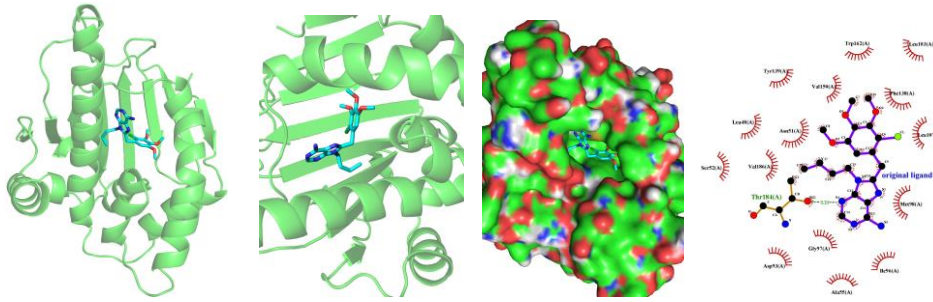

2.HSP90AA1- original ligand

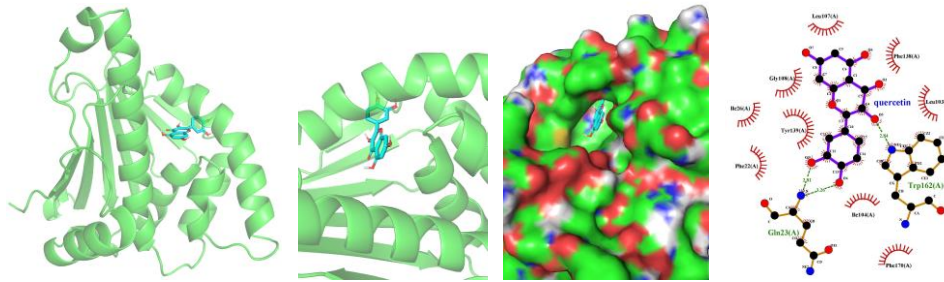

3.HSP90AA1-quercetin

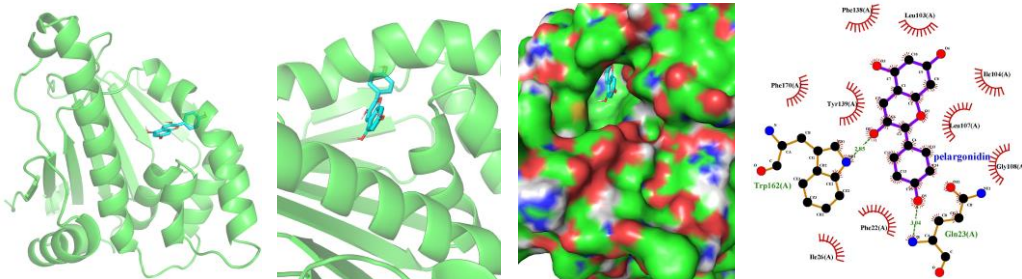

4.HSP90AA1-pelargonidin

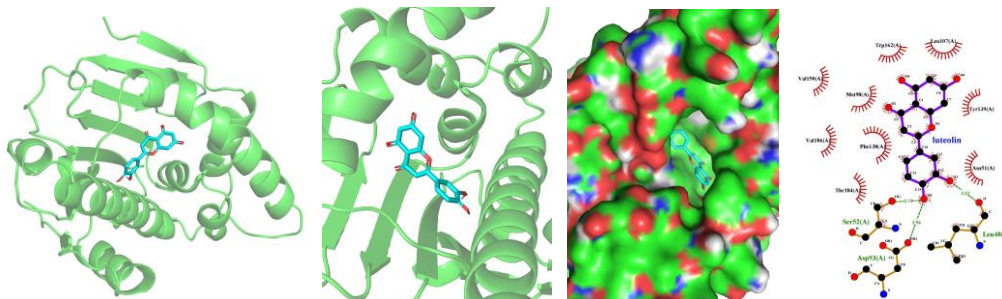

5.HSP90AA1-luteolin





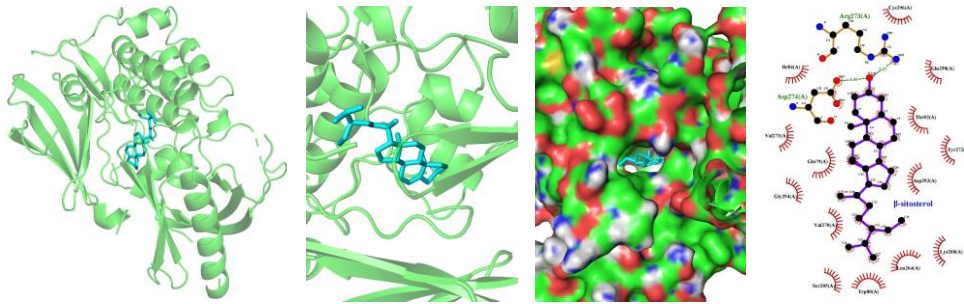

11.AKT1- $\beta$ -sitosterol

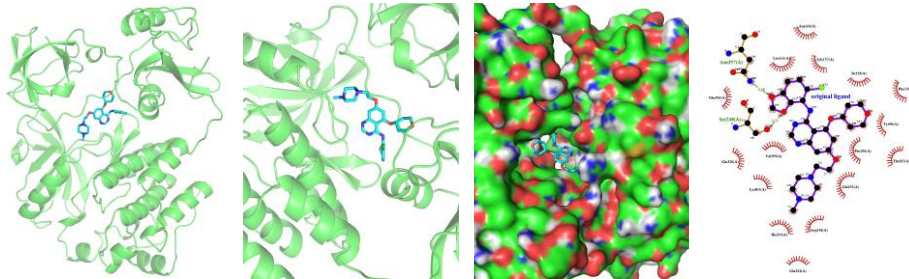

12.SRC- original ligand

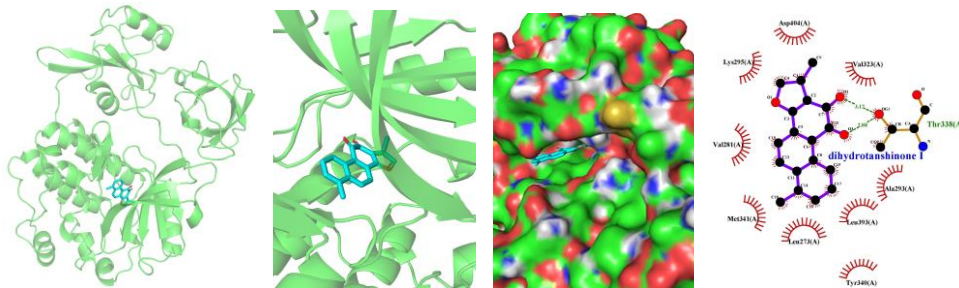

13.SRC- dihydrotanshinone I

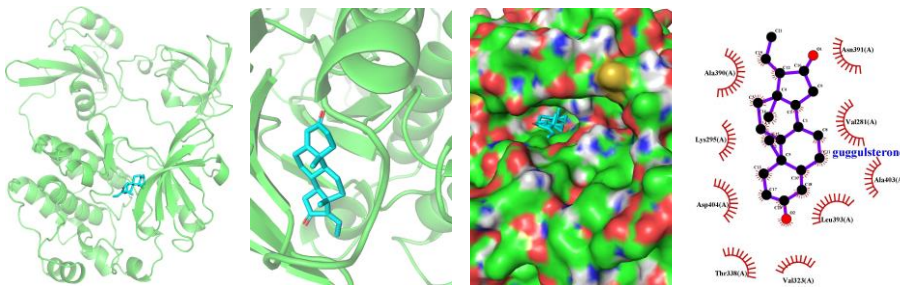

14.SRC-guggulsterone

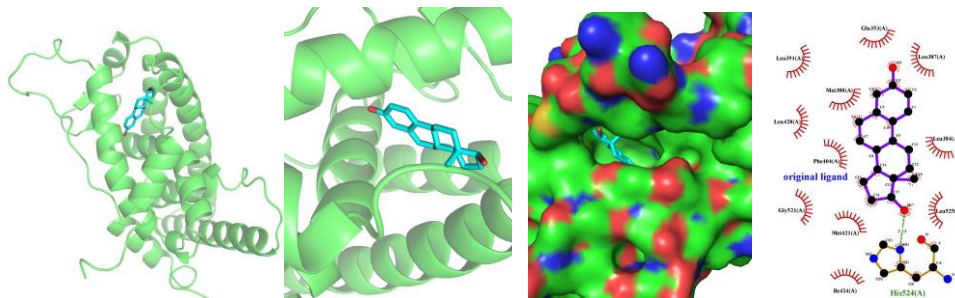

15.ESR1- original ligand

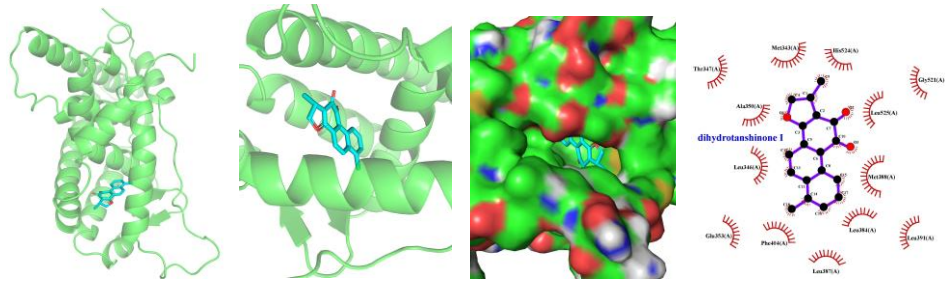

16. ESR1- dihydrotanshinone I

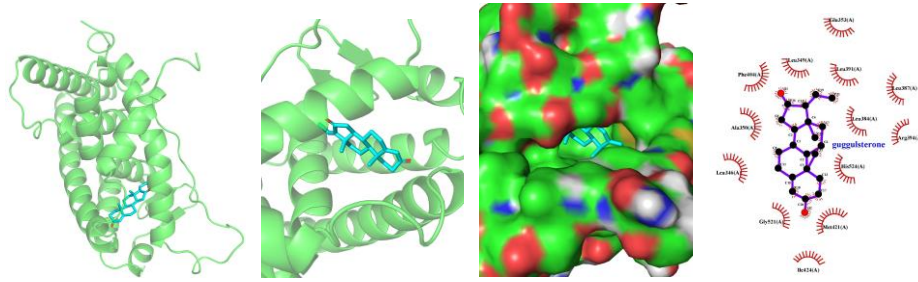

17. ESR1- guggulsterone

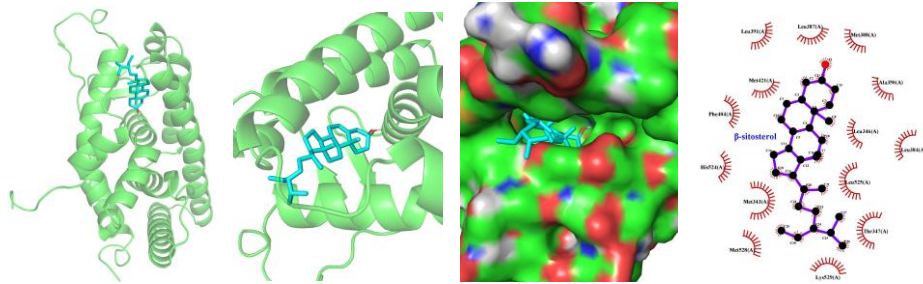



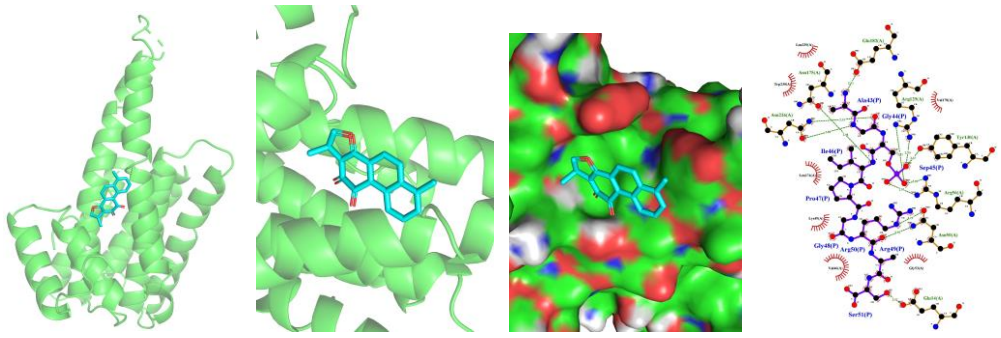

21. RELA- dihydrotanshinone I

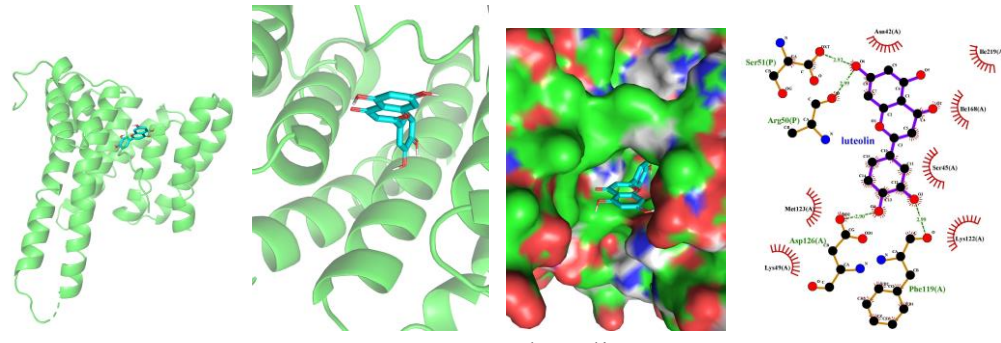

22. RELA- luteolin

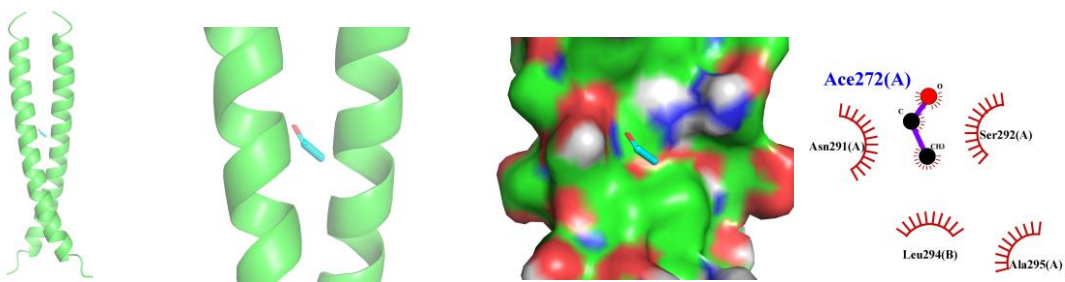

23. JUN- original ligand

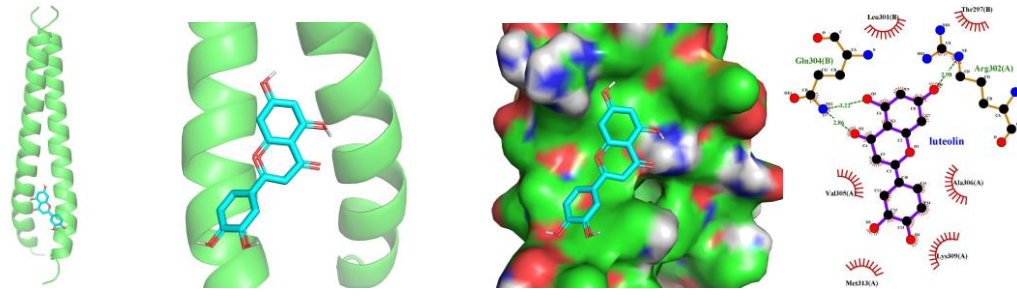

Supplement: Supplementary file 1 [file get_supplementary_file.php]
